1 **Factors Associated With Chronic Arthropathy And Rheumatological Diseases After Chikungunya**

2 **Infection in Colombia: A Case-Control Study**

3

4

5

6

7 **Author**

8 **Guillermo Alejandro Ramírez Luna**

9 **MD, Internal Medicine, Rheumatology, MSc. Epidemiology**

10 **Reumatología del Valle, Colombia**

11 [alejolunera@hotmail.com](mailto:alejolunera@hotmail.com)

12

13 **Co-author**

14 **Fabian Méndez Paz**

15 **MD, MSc. PhD. Epidemiology**

16 **Tenured Professor, Public Health School, Universidad del Valle, Cali, Colombia**

17 [fabian.mendez@correounivalle.edu.co](mailto:fabian.mendez@correounivalle.edu.co)

18

19

## 20 Abstract

21 **Objective** To identify the factors associated with the development of chronic arthropathy and  
22 rheumatological conditions in individuals who presented with clinical chikungunya infection.

23 **Methods** A case-control study was carried out among individuals with a clinical diagnosis of chikungunya  
24 treated at a Colombian Health Provider Institution between 2014 and 2015. Two logistic regression  
25 models were constructed: one excluding the variables with more than 50% of the missing data, and  
26 another with all the variables but with the imputed data.

27 **Results** In total 133 cases and 216 controls were obtained (349 individuals). In both models, female gender  
28 was a risk factor (OR: 2.27, CI95: 1.03 - 4.97,  $p = 0.04$ , and OR: 2.37, CI95: 1.09 - 5.17,  $p = 0.029$ ,  
29 respectively), while acute involvement of the wrists was a protective factor (OR: 0.44, CI95: 0.20 - 0.95,  $p$   
30  $< 0.037$ ; and OR: 0.29, CI95: 0.13 - 0.65,  $p = 0.003$  respectively). Arthralgia duration was a risk factor in the  
31 imputed data model (OR: 1.03, CI95: 1.00 - 1.06,  $p = 0.02$ ).

32 **Conclusion** Female gender and the duration of joint symptoms in the acute phase were the main risk  
33 factors for the development of chronic chikungunya arthropathy or rheumatological pathology. Wrist  
34 involvement was a protective factor. Only rheumatoid arthritis was found to be a rheumatological disease  
35 associated with chikungunya infections. Finally, this study suggests that the interaction between usual  
36 cardiovascular factors could enhance the probability of developing chronic symptoms.

37 **Keywords:** Chikungunya, Rheumatoid Arthritis, Chronic Chikungunya Arthropathy, Risk Factors, Colombia

38

## 39 Introduction

40 Acute chikungunya disease (CHKGV) is a viral infection that manifests as a critical febrile illness  
41 accompanied by exanthema and intense generalized arthralgia or arthritis which becomes chronic in some

42 individuals. (1,2) The term "Chikungunya" comes from Mozambique, Africa, and means "to be inclined"  
43 alluding to the posture adopted by the intensity of arthralgia. The chikungunya virus is an alphavirus  
44 belonging to the Togaviridae family and is mainly transmitted by *Aedes albopictus* and *Aegypti*  
45 mosquitoes. Since 2013, the chikungunya virus has been endemic in the Americas, including Colombia,  
46 where the epidemic occurred from 2014 to 2015 in almost the entire national territory located 2.200  
47 below sea level, with more than 123 municipalities affected. The most frequent complication is chronic  
48 chikungunya arthropathy, which consists of severe polyarticular pain that persists for more than 3 months  
49 and affects 30% of infected individuals (3–7). The appearance of rheumatological conditions such as  
50 rheumatoid arthritis, inflammatory spondyloarthropathy, systemic lupus erythematosus, and Sjögren  
51 syndrome after infection has also been described (7–12). On the other hand, in the general population  
52 there are associations between rheumatological diseases such as a higher probability of presenting with  
53 rheumatoid arthritis if there is a family history of systemic lupus erythematosus, Sjögren's syndrome, or  
54 polymyalgia rheumatica (13) as well as frequent joint involvement, some immunological markers, the  
55 response to immunosuppressive drugs, and in general the highest prevalence in women. It seems that  
56 those infected with CHIKV are at risk of developing some of them, but in addition, joint symptoms due  
57 to chikungunya can be indistinguishable from early rheumatoid arthritis to the point that rheumatoid  
58 arthritis classification criteria have been used for its diagnosis (8,12,14–18).

59 Globally, factors associated with the development of chronic chikungunya arthropathy have been  
60 described, including advanced age, female sex, history of osteoarthritis, the severity of clinical  
61 presentation, elevated levels of C-reactive protein, elevated levels of IgG, persistence of virus RNA  
62 detection beyond 7 days after the onset of symptoms, and absenteeism from work, among others (7,17–  
63 26).

64 In Colombia, studies have evaluated the factors associated with the development of chronic arthropathy  
65 only in the state of Tolima and the state of Atlantic. However, the results have been dissimilar (15,21).

66 Valle del Cauca is one of the main states of the country and is one of the most affected by the Chikungunya  
67 epidemic; however, there is a lack of studies in this regard. It is highly probable that new epidemic  
68 outbreaks will occur, therefore it was decided to carry out a case-control analysis in a population of such  
69 a state to identify the factors associated with chronic arthropathy and/or rheumatological conditions in  
70 individuals who presented clinical infection by Chikungunya.

71

## 72 **Subjects and methods**

### 73 **Study design**

74 A case-control study was conducted among individuals with a clinical diagnosis of Chikungunya treated at  
75 a Health Provider Institution (HPI) between 2014 and 2015. The HPI are entities of a private, public, or  
76 mixed nature authorized to provide the health services contemplated in the Colombian Obligatory Health  
77 Plan. The HPI of this study is located in the state of Valle del Cauca, and serves approximately 6,200  
78 individuals per year, mainly belonging to socioeconomic strata 3, 4, and 5 (there are 6 strata in Colombia  
79 and they are categorized from lowest to highest as socioeconomic conditions improve) and with 95%  
80 affiliation to the contributory regime (salaried individuals and their family nucleus). Valle del Cauca,  
81 Colombia, is the second most developed department in the country and had a population of 4,600,000  
82 inhabitants until 2015

83

### 84 **Definitions**

85 A case was defined as any individual who developed any of the following conditions after infection:  
86 chronic inflammatory arthropathy, systemic lupus erythematosus, Sjögren syndrome, seropositive or  
87 seronegative rheumatoid arthritis, rheumatic polymyalgia, or inflammatory spondyloarthropathy. Chronic

88 inflammatory arthropathy is defined as the persistence or presence of inflammatory arthralgia(s) after 3  
89 months of the acute phase of CHKNV infection, as long as other causes of chronic inflammatory  
90 arthropathy, such as the pathologies previously mentioned, have been discarded (see definitions in the  
91 Supplemental Digital Content 1).

92 The controls were the individuals who presented with clinical chikungunya infection but did not develop  
93 any of the mentioned pathologies.

94 It was decided not to match for any factor considering that, since it is a case-control study, this procedure  
95 can bias the measure of association towards the null value when the exposure variable is related to the  
96 confounder (36)

#### 97 **Sample size calculation**

98 Using the Fleiss method (27) a sample size of 135 individuals was estimated for an alpha error of 5%, a  
99 power of 80%, a prevalence of exposure "age over 45 years" in controls of 59%, a ratio of 2:1 between  
100 controls and cases, and an estimated data loss of 20% out of an expected OR of 3.9 (7).

101 Finally, the cumulative incidence of different rheumatological diseases evaluated in this study was  
102 explored in the population that made up the sampling frame using the ICD-10 codes described in Table  
103 A1 (Supplemental Digital Content 2). The frequency of chronic arthropathy due to chikungunya was not  
104 performed on the sample frame because there was no specific ICD 10 for this condition. However, they  
105 were calculated from the total reviewed records. In the case of polymyalgia rheumatica, the calculations  
106 were performed on patients aged 50 years or older.

107

#### 108 **Data collection.**

109 The HPI of the study provided the medical records of the sample frame, which was selected using ICD-10  
110 A920. The ICD-10 codes described in Table A1 (Supplemental Digital Content 2) were used to search for  
111 cases. The medical records of the cases and controls were selected using simple random sampling, which  
112 were previously coded to provide anonymity, however before taking the sample, one of the author had  
113 access to all the information for the purposes of coding the clinical histories. For the definition of  
114 chikungunya infection, the clinical criteria of the attending physician were used as long as the presence  
115 of fever and arthralgia was recorded in history. The period in which the sampling frame was extracted was  
116 from July 1, 2014, when the first case of chikungunya was recorded in Colombia, to December 31, 2015,  
117 which corresponded to the end of the epidemic. The data access was obtained in august 2019.

118 Taking into account the difficulties in Colombia to obtain confirmatory laboratory tests in most suspected  
119 cases of Chikungunya, it was decided to use the clinical criteria of the attending physician, as long as the  
120 presence of fever and arthralgias, appealing to the classification criteria of the WHO (37). The period  
121 selected to collect the sample was the one with the highest number of cases recorded in Colombia to  
122 ensure a higher positive predictive value for the clinical definition of chikungunya.

123 The inclusion criteria were individuals aged 16 years or older with a clinical diagnosis of Chikungunya  
124 infection.

125 Individuals diagnosed with the rheumatic disease before chikungunya infection and those receiving  
126 immunosuppressants or any drug used to prevent transplant rejection, control rheumatic diseases, or any  
127 curative treatment of cancer including chemotherapy were excluded.

128 Sociodemographic factors, the pathological history of individuals, and clinical factors associated with  
129 infection were explored. Information on socioeconomic status was unavailable.

130 The study was approved by the Ethics Committee of the Faculty of Health of the Universidad del Valle  
131 CIREH and the Ethics Committee of the HPI from which the study subjects came (approved record 007-  
132 020), which waived the requirement for informed consent.

133

#### 134 **Statistic analysis**

135 Normality was evaluated using the Shapiro-Wilk test. Means and standard deviations were used as  
136 measures of central tendency and dispersion, respectively, and Student's t-test was used for comparison  
137 between groups. Medians and interquartile ranges were used for variables that did not meet the  
138 normality criteria, and the Wilcoxon and Kruskal-Wallis tests were used for comparison between groups.  
139 For the "weight" variable the mode was used. Logistic regression and 2 × 2 tables were used to obtain raw  
140 ORs with their respective 95% confidence intervals. To facilitate the analysis, age was dichotomized into  
141 "greater than or equal to, and under 40 years of age", body mass index normal/low was grouped into  
142 "low" and overweight and more into "high", and educational levels corresponding to primary school,  
143 preschool, and no education were grouped into "low", and the rest of the levels as "high".

144 Co-linearity was evaluated using the Pearson's test. For the adjusted analysis, three logistic regression  
145 models for estimate OR were made using the stepwise method: one with the sociodemographic variables  
146 and background of the individual, another with the clinical variables of the infection, and the last one with  
147 the laboratory variables. Subsequently, a model was made with the variables of the 3 models that had a  
148 statistical significance of less than 0.2.

149 Given that there was a decrease in the sample size of almost 90% with this model, two models were  
150 created: one excluding the variables with more than 50% of the missing data and another with all the  
151 variables but with the imputed data using the multiple imputation method.

152 The Goodness of fit was estimated using the Hosmer test, Pearson's residual and deviance analysis, and  
153 the Bayesian information criterion (BIC).

154 Two sensitivity analyses were performed to evaluate the misclassification bias for chikungunya infection  
155 using the diagnostic performance of the WHO criteria as a basis and another test for mortality by age as  
156 a competing risk. The potential interactions between the study factors were also explored. Stata software  
157 version 14 and Microsoft Excel 2013 were used for analysis.

158

## 159 **Results**

160 The sample frame consisted of 7050 individuals. Since a significant loss of data from the medical records  
161 was evidenced during the collection of the information, it was decided to collect a sample at least twice  
162 the expected number, obtaining a sample of 349 individuals, 133 cases, and 216 controls. The selection  
163 process is illustrated in Figure 1.

164 The first individual with chikungunya in the study dates on January 13, 2015, and the last on December  
165 26 of the same year. Only 1.72% of the individuals in the study achieved a professional degree, and none  
166 had a master's, doctorate, or postgraduate degree. Regarding the behavior of the laboratory variables, a  
167 record of C-reactive protein or erythrocyte sedimentation rate was not obtained in a sufficient number of  
168 individuals to perform a reliable analysis. No cases of inflammatory spondyloarthritis were observed  
169 in this study.

170 The cumulative incidence of chronic chikungunya from 2015 to 2019 was 23%, for rheumatoid arthritis  
171 was 25.8/10,000 vs. 7.5/10,000 in the general population ( $p < 0.001$ ), for systemic lupus erythematosus  
172 was 27/100,000 vs. 25/100,000 ( $p = 0.78$ ), for Sjögren syndrome 14/100,000 vs. 29/100,000 ( $p = 0.022$ ),



173 and rheumatic polymyalgia 9.3/10,000 vs. 32/10,000 in the population older than 50 years ( $p < 0.001$ ).

174 Only Rheumatoid Arthritis had a higher cumulative incidence than the general population.

175 In the bivariate analysis, *female gender, diabetes, osteoarthritis, COPD and duration of arthralgia* were  
176 risk factors. In contrast, the involvement of wrists and arthralgia (vs arthritis) were protective factors; the  
177 results are presented in Tables 1 and Table A2 (see Supplemental Digital Content 3), respectively. Case  
178 subtypes were distributed as follows: one hundred and eleven individuals with chikungunya arthropathy  
179 (83,4%), eight with seronegative rheumatoid arthritis (6,02%), seven with seropositive rheumatoid  
180 arthritis - positive rheumatoid factor (5,26%), three with seropositive rheumatoid arthritis - positive  
181 rheumatoid factor and anti-citrullinated protein antibodies (2,26%), two individuals with systemic lupus  
182 erythematosus (1,5%), one individual with Sjögren syndrome (0,75%), and one individual with polymyalgia  
183 rheumatica (0,75%).

184 When the three regression models were made a) with the sociodemographic variables and background  
185 of the individual, b) with the clinical variables of the infection, and c) with the laboratory variables, it was  
186 found that *female gender, osteoarthritis, and duration of arthralgia* remained significant after adjustment  
187 ( $p < 0,05$ ). No statistical significance was found in the model that evaluated the laboratories (leukocytes,  
188 hemoglobin, and platelets) (data no shown).

189 Given that there was a loss of data with the model composed of the significant variables from the 3 models  
190 previously described (see statistic analysis section), the alternative strategy was carried out in which two  
191 models were built: one with the imputed data of the variables with  $p < 0,2$  coming from the bivariate  
192 analysis, and the other excluding the variables that had more than 50% of missing data (table A3,  
193 Supplemental Digital Content 4).

194 In both models, the female gender showed evidence of being a risk factor (OR: 2.27, CI95: 1.03 - 4.97, =  
195 0.04 in the imputed data, and OR of 2.37, CI95: 1.09 - 5.17,  $p = 0.029$  in the model that excludes missing

196 data) while acute involvement of the wrists behaved as a protective factor (OR: 0.44, CI95: 0.20 - 0.95, p  
197 < 0.037 in the imputed data model and OR of 0.29, 95 CI: 0.13 - 0.65, p = 0.003 in the model that excludes  
198 missing data). In contrast, Arthralgia duration was a significant risk factor (OR: 1.03, CI95: 1.00 - 1.06, p =  
199 0.02) just in the imputed data model. In the model that excluded variables with high data losses, acute  
200 involvement of the elbows (OR: 2.66, CI95: 1.22 - 5.77, p = 0.013) and the High body mass index  
201 (overweight or obesity, OR: 2.1, CI95: 1.00 - 4.42, p = 0.05) were risk factors. The results of both models  
202 are presented in Tables 2 and 3.

### 203 Interactions

204 When evaluating female sex and having diabetes, it was found that although there was a loss of statistical  
205 significance of these variables in the model, a statistically significant positive interaction was found  
206 between them (p = 0.029). Female sex and having a low educational level showed a positive interaction  
207 (p = 0.003), as did being 40 years old or older and overweight or obese, (p: 0.02), age 40 years or older  
208 and having a low educational level (p: 0.003), and being diabetic and having a low educational level (p =  
209 0.05) (See figure 2). All variables lost statistical significance in each model. The fact that patients with  
210 rheumatological diseases have a higher cardiovascular risk, that cardiovascular events have inflammatory  
211 components, and that obesity and smoking are factors associated with rheumatoid arthritis, interactions  
212 between dyslipidemia, smoking, diabetes, and hypertension were explored. An interaction was found only  
213 between dyslipidemia and hypertension (p = 0.014), without statistical significance for each of the  
214 variables in the model.

215 For the sensitivity analysis of the diagnostic inaccuracy of the WHO criteria for chikungunya, a probability  
216 of 7% of potential false positives in the sample was calculated (see supplemental digital content 5). Based  
217 on the low incidence of rheumatic diseases in the general population, an initial analysis was performed  
218 assuming that the false positives were most likely controls and that the distribution of the exposition

219 variables in these was similar to that of the study sample in the case of sex and age, and to that of the  
220 general population for variables for which data were available (28–32). Only COPD showed an increase in  
221 the magnitude of the association.

222 A second analysis was performed assuming extreme behavior of the data where all false positives were  
223 grouped each time in a quadrant of the 2 x 2 table for cases and controls. The results were highly variable  
224 and many of them were conditioned by a low number of individuals in some cells (data not shown).  
225 Although these scenarios are assumed to be unlikely, they can be considered for the analysis of the studies  
226 about behavior of a new epidemic when it does not develop as expected. Finally, it was calculated that at  
227 least six individuals in the control group over 40 years of age could have died. Assuming that they could  
228 have been cases, the ORs for age were recalculated and in the bivariate analysis the OR went from 1.49  
229 (95CI: 0.93 - 2.39,  $p = 0.07$ ) to 1.69 (95CI: 1.06 - 2.7,  $p = 0.01$ ) raising the possibility of age as an unadjusted  
230 risk factor.

231

## 232 **Discussion**

233 This study identified factors associated with the development of chronic arthropathy and/or rheumatic  
234 diseases in a specific population of Valle del Cauca, including other findings that should be mentioned.  
235 The majority of individuals affected by symptomatic chikungunya were women; it is unclear whether this  
236 represents a greater susceptibility to infection or a greater frequency of consultation with health services.  
237 On the other hand, there was little representation of high educational levels that somehow reflected the  
238 Colombian population's distribution of education, where only a few reached professional and  
239 postgraduate levels.

240 When the frequencies of rheumatoid arthritis, systemic lupus erythematosus, Sjögren's, and polymyalgia  
241 rheumatica were evaluated in the sample frame, a deficient representation of these conditions was found,

242 except for rheumatoid arthritis, which was also the only one that presented an annual incidence higher  
243 than that expected in the general population. This suggests that the publications or reports that have  
244 described individuals with systemic lupus erythematosus, Sjögren syndrome, ankylosing spondylitis, and  
245 polymyalgia rheumatica after chikungunya may show only fortuitous associations. When performing all  
246 the calculations of the study but excluding the individuals with these diagnoses (four in total,  
247 corresponding to 1.14% of the sample), there was no significant change in the results (data not shown).  
248 In the case of chronic chikungunya, the prevalence was lower than that reported in other studies, which  
249 reached up to 40% (33). This is possible because these studies were based on self-reports obtained  
250 through interviews and included a wide range of symptoms, not only in joints but also in muscles and  
251 tendons. However, the underreporting of symptomatic patients who did not attend health services cannot  
252 be ruled out in this study.

253 Regarding the main objective of the study, it should be mentioned that the female sex was one of the  
254 factors associated with the development of rheumatological disease or chronic arthropathy, which is  
255 consistent with other studies, and with the fact that rheumatological conditions are more frequent in  
256 women than in men, except for spondyloarthropathy, which was not found in the present study  
257 (17,23,26). As inflammatory arthropathies are diseases with complex features, it is possible that  
258 chikungunya interacts with the peculiarities inherent to the female sex, such as hormonal, social, and  
259 environmental factors, and triggers the development of the disease (34,35).

260 By what happens in arthritis and polymyalgia rheumatica, the age in the crude analyses behaved as a risk  
261 factor. It could be that the senescence of the immune system explains it because of its loss of regulation  
262 and tolerance over time (35); however, the explanation is necessarily more complex and it can be related  
263 to the multiple biological and social changes strongly associated with the life cycle of the individuals that,  
264 in the present study and other similar ones, can explain the loss of statistical significance when adjusting  
265 for other variables.

266 Osteoarthritis is another factor found in the crude analysis and is similar to previous studies. It is difficult  
267 to conclude in this type of study that this condition is predisposing because although it is plausible that  
268 joint structural alterations increase susceptibility to inflammatory phenomena, memory biases can  
269 generate false associations, or, as in the present study, be confused by other variables, especially age.

270 The duration of arthralgia in the acute stage was a consistent risk factor in this and other studies. Despite  
271 being one of the variables with the most missing data, it behaved as a risk factor in the crude analysis, the  
272 regression model that only evaluated the characteristics of the infection, and the model with imputed  
273 data. It may be the manifestation of an individual's predisposition for the symptom to remain chronic, but  
274 it can also respond to the presence of a gradient in which the more significant the intensity and/or initial  
275 duration of the symptoms, the greater the probability that it will become chronic, as other studies have  
276 suggested, where pain intensity, the persistence of viral load over time, absenteeism from work, and high  
277 levels of IL-6 and immunoglobulin G are risk factors for chronic chikungunya arthropathy  
278 (5,7,18,19,21,22,25)

279 Regarding the involvement of the elbows as a risk factor and the wrists as a protective factor, although it  
280 may be just chance and/or confounded by other factors, different rheumatological pathologies have a  
281 propensity for certain types of joints. For example, rheumatoid arthritis is located predominantly in the  
282 hands and small joints symmetrically; polymyalgia rheumatica compromises the bursae of the pelvic and  
283 shoulder girdle, while spondyloarthropathies are located in large joints asymmetrically. Thus, joint  
284 location may respond to the particularities of individuals that predispose or protect them against the  
285 development of chronic arthropathy after chikungunya infection. Finally, the finding of arthralgia as a  
286 protective factor when compared to arthritis is reciprocal to the fact that arthritis behaves as a risk factor,  
287 which coincides with the possible existence of a severity gradient as previously described.

288 The interactions found in this study suggest that intervening conventional risk factors such as overweight,  
289 diabetes, hypertension, or dyslipidemia, and in social determinants of health, such as the educational level  
290 in this case, could reduce the risk of developing chronic joint pathology in the event of a new outbreak of  
291 chikungunya.

292 This study has several limitations. First, it was not possible to select the individuals with laboratory tests  
293 because the source of information was medical records. In exchange, the medical criterion was appealed  
294 to, which is considered a good approximation if one believes that professional training and expertise  
295 better classify patients and their clinical symptoms when compared to self-report or telephone interviews.

296 Because of the limitation in the number of individuals other than mestizo ethnicity, it was not possible to  
297 make inferences related to this factor, extending the same restriction to the area of residence since the  
298 vast majority belong to the urban area. This reflects the type of individuals in the study, including subjects  
299 insured by the Colombian health system in the contributory regime (salaried workers and their families).  
300 Similarly, the low representativeness of the extreme socioeconomic strata and high educational levels  
301 limit the extrapolation of the results to the entire population. In any case, this study represents one of the  
302 most important groups of the Colombian population (mestizo, salaried individuals living in urban areas)  
303 for whom the information in the study is helpful, including the development of specific public policies.

304 Important information, such as socioeconomic status, was not available, although details on educational  
305 level were obtained, which provides similar information. Nevertheless, it is essential to obtain this  
306 information in future studies.

307 Nine variables had more than 50% data loss (23% of the variables). The sample size which was almost  
308 three times higher than the calculated one, and the imputation of the data, compensated for this  
309 limitation.

310 Finally, information based on medical records was limited to those who attended health services. For this  
311 reason, there is the possibility of a selection bias towards sicker individuals, with better socioeconomic  
312 status, and female predominance. If low socioeconomic status and then a low educational level are risk  
313 factors for case development, this association may have been diluted.

314 Despite the limitations described, the study answered the main question and specific objectives  
315 adequately and was able to explore the relationship between different rheumatological diseases and  
316 chikungunya infection.

### 317 **Conclusions**

318 The present study found that female gender and the duration of joint symptoms in the acute phase were  
319 the main risk factors for the development of chronic chikungunya arthropathy or rheumatological  
320 pathology in Valle del Cauca, Colombia. Wrist involvement was found to behave as a protective factor. In  
321 this study, only rheumatoid arthritis was found to be a rheumatological disease associated with  
322 chikungunya infection. Finally, the study suggests that conventional cardiovascular risk factors such as  
323 hypertension, diabetes, obesity, dyslipidemia, and low educational level, could interact with each other  
324 and enhance the probability of developing chronic symptoms after clinical infection by the chikungunya  
325 virus.

326 A prospective, population-based study with a laboratory diagnosis of infection is necessary to resolve the  
327 limitations and clarify the questions that arose during the development of this research.

328

### 329 **Take-home messages:**

- 330 • Chikungunya infection can cause chronic joint pain in up to 30% of the affected patients.

331 • Female gender and prolonged duration of joint symptoms in the acute phase are risk factors for  
332 developing chronic symptoms, whereas wrist involvement is likely to be a protective factor.

333 • The simultaneous presence of hypertension, diabetes, obesity, dyslipidemia, and low educational level  
334 in an individual seems to increase the risk of chronic joint symptoms after chikungunya infection;  
335 therefore, intervention may be a strategy to reduce the risk of this complication.

336 • Rheumatoid arthritis appears to be the only rheumatological disease associated with chikungunya  
337 infection. Further studies are required to clarify this association.

338

339

340

341

342

343

344

345

#### 346 **Bibliography**

347 1. Hua C, Combe B. Chikungunya Virus-Associated Disease. *Curr Rheumatol Rep* [Internet].

348 2017 Nov 5 [cited 2018 Apr 24];19(11):69.

349 2. Kucharz EJ, Cebula-Byrska I. Chikungunya fever. *Eur J Intern Med* [Internet]. 2012 Jun [cited

350 2018 Jun 3];23(4):325–9.



- 351 3. Organización Panamericana de la Salud/ Organización Mundial de la Salud (2016) Alerta  
352 Epidemiológica. Fiebre por Chikungunya. 9 de diciembre del 2013. (Accessed Jul 2016)  
353 [Internet]. [cited 2018 Oct 6].
- 354 4. Petersen LR, Powers AM. Chikungunya: epidemiology. F1000Research. 2016;
- 355 5. Javelle E, Ribera A, Degasne I, et al. Specific management of post-chikungunya rheumatic  
356 disorders: a retrospective study of 159 cases in Reunion Island from 2006-2012. Munoz-  
357 Zanzi C, editor. PLoS Negl Trop Dis [Internet]. 2015 Mar 11 [cited 2018 Apr  
358 29];9(3):e0003603.
- 359 6. Borgherini G, Poubeau P, Jossaume A, et al. Persistent arthralgia associated with  
360 chikungunya virus: a study of 88 adult patients on reunion island. Clin Infect Dis [Internet].  
361 2008 August 15 [cited 2018 June 3];47(4):469–75.
- 362 7. Sissoko D, Malvy D, Ezzedine K, et al. Post-epidemic Chikungunya disease on Reunion  
363 Island: course of rheumatic manifestations and associated factors over a 15-month period.  
364 La Beaud AD, editor. PLoS Negl Trop Dis [Internet]. 2009 Mar 10 [cited 2018 Apr  
365 24];3(3):e389.
- 366 8. Mathew AJ, Goyal V, George E, et al. Rheumatic-musculoskeletal pain and disorders in a  
367 naïve group of individuals 15 months following a Chikungunya viral epidemic in south India:  
368 a population based observational study. Int J Clin Pract [Internet]. 2011 Dec [cited 2018 Apr  
369 24];65(12):1306–12.
- 370 9. Amaral JK, Martins Teixeira M, Schoen RT. Case Report Acute chikungunya fever followed  
371 by systemic lupus erythematosus. Curr Rheumatol Res. 2020;1(1):6–8.
- 372 10. de Carvalho JF, Kanduc D, da Silva FF, et al. Sjögren's Syndrome Associated with

- 373 Chikungunya Infection: A Case Report. *Rheumatol Ther* [Internet]. 2021 Mar 1 [cited 2022  
374 Jan 16];8(1):631.
- 375 11. Duran AS, Beron A, Duran SS, et al. SAT0568 Rheumatological manifestations in a series of  
376 patients with chikungunya fever. *Ann Rheum Dis* [Internet]. 2017 June 1 [cited 2021 August  
377 1];76(Suppl 2):991–991.
- 378 12. Foissac M, Javelle E, Ray S, et al. Post-Chikungunya rheumatoid arthritis, Saint Martin.  
379 *Emerg Infect Dis* [Internet]. 2015 Mar [cited 2018 April 24];21(3):530–2
- 380 13. Hemminki K, Li X, Sundquist J, et al. Familial associations of rheumatoid arthritis with  
381 autoimmune diseases and related conditions. *Arthritis Rheum* [Internet]. 2009 Mar 1 [cited  
382 2018 Oct 15];60(3):661–8.
- 383 14. Chen LH, Rodriguez-Morales AJ, Gil-Restrepo AF, et al. Post-chikungunya chronic  
384 inflammatory rheumatism: results from a retrospective follow-up study of 283 adult and  
385 child cases in La Virginia, Risaralda, Colombia [version 2; referees: 3 approved]. [cited 2018  
386 April 24]
- 387 15. Consuegra-Rodríguez MP, Hidalgo-Zambrano DM, Vásquez-Serna H, et al. Post-chikungunya  
388 chronic inflammatory rheumatism: Follow-up of cases after 1 year of infection in Tolima,  
389 Colombia. *Travel Med Infect Dis* [Internet]. 2018 Jan [cited 2018 Apr 24];21:62–8.
- 390 16. Miner JJ, Aw-Yeang H-X, Fox JM, et al. Chikungunya viral arthritis in the United States: a  
391 mimic of seronegative rheumatoid arthritis. *Arthritis Rheumatol (Hoboken, NJ)* [Internet].  
392 2015 May [cited 2018 June 3];67(5):1214–20.
- 393 17. Essackjee K, Goorah S, Ramchurn SK, et al. Prevalence of and risk factors for chronic  
394 arthralgia and rheumatoid-like polyarthritis more than 2 years after infection with

- 395 chikungunya virus. *Postgrad Med J* [Internet]. 2013 Aug [cited 2018 Apr 24];89(1054):440–  
396 7.
- 397 18. Yaseen HM, Simon F, Deparis X, et al. Identification of initial severity determinants to  
398 predict arthritis after chikungunya infection in a cohort of French gendarmes. *BMC*  
399 *Musculoskelet Disord* [Internet]. 2014 Dec 24 [cited 2018 Apr 24];15(1):249.
- 400 19. Elsinga J, Gerstenbluth I, Van Der Ploeg S, et al. Long-term Chikungunya Sequelae in  
401 Curaçao: Burden, determinants, and a novel classification tool. *J Infect Dis*. 2017;216(5).
- 402 20. Murillo-Zamora E, Mendoza-Cano O, Trujillo-Hernández B, et al. Persistent arthralgia and  
403 related risks factors in laboratory-confirmed cases of Chikungunya virus infection in  
404 Mexico. *Rev Panam Salud Publica*. 2017;41(9).
- 405 21. Chang AY, Encinales L, Porras A, et al. Frequency of Chronic Joint Pain Following  
406 Chikungunya Virus Infection: A Colombian Cohort Study. *Arthritis Rheumatol*. 2018;70(4).
- 407 22. Huits R, De Kort J, Van Den Berg R, et al. Chikungunya virus infection in Aruba: Diagnosis,  
408 clinical features and predictors of post-chikungunya chronic polyarthralgia. Ansari AA,  
409 editor. *PLoS One* [Internet]. 2018 Apr 30 [cited 2018 Jun 3];13(4):e0196630.
- 410 23. Sepúlveda-Delgado J, Vera-Lastra OL, Trujillo-Murillo K, et al. Inflammatory biomarkers,  
411 disease activity index, and self-reported disability may be predictors of chronic arthritis  
412 after chikungunya infection: brief report. *Clin Rheumatol*. 2017;36(3).
- 413 24. Gérardin P, Fianu A, Michault A, et al. Predictors of Chikungunya rheumatism: a prognostic  
414 survey ancillary to the TELECHIK cohort study. *Arthritis Res Ther* [Internet]. 2013 January 9  
415 [cited 2018 April 24];15(1):R9.
- 416 25. Martí-Carvajal A, Ramon-Pardo P, Javelle E, et al. Interventions for treating patients with

- 417 chikungunya virus infection-related rheumatic and musculoskeletal disorders: A systematic  
418 review. Gualillo O, editor. PLoS One [Internet]. 2017 Jun 13 [cited 2018 Apr  
419 24];12(6):e0179028.
- 420 26. Heath CJ, Lowther J, Noël TP, et al. The Identification of Risk Factors for Chronic  
421 Chikungunya Arthralgia in Grenada, West Indies: A Cross-Sectional Cohort Study. Open  
422 forum Infect Dis [Internet]. 2018 Jan [cited 2019 Aug 31];5(1):ofx234.
- 423 27. Statistical Methods for Rates and Proportions. Second Edition - Joseph L. Fleiss - Google  
424 Libros [Internet]. [cited 2020 Mar 23]. Available from:  
425 [https://books.google.com.co/books/about/Statistical\\_Methods\\_for\\_Rates\\_and\\_Propor.ht](https://books.google.com.co/books/about/Statistical_Methods_for_Rates_and_Propor.html?id=I79_MgAACAAJ&redir_esc=y)  
426 [ml?id=I79\\_MgAACAAJ&redir\\_esc=y](https://books.google.com.co/books/about/Statistical_Methods_for_Rates_and_Propor.html?id=I79_MgAACAAJ&redir_esc=y)
- 427 28. Segura Rosero A, Vidal Martínez J, Parody A, J et al. Respuesta inmunitaria de una  
428 población del caribe colombiano infectado con el virus del chikungunya. Revista  
429 colombiana de reumatología. [Internet]. Vol. 23, 2016 [cited 2018 Jun 3]. 85–91 p.
- 430 29. Xie M, Liu X, Cao X, et al. Trends in prevalence and incidence of chronic respiratory diseases  
431 from 1990 to 2017. [cited 2021 Apr 25]; Respir Res. 2020, feb 11;21(1):49
- 432 30. Khan MAB, Hashim MJ, King JK, et al. Epidemiology of Type 2 diabetes - Global burden of  
433 disease and forecasted trends. J Epidemiol Glob Health [Internet]. 2020 Mar 1 [cited 2021  
434 Apr 25];10(1):107–11.
- 435 31. Enfermedad pulmonar obstructiva crónica (EPOC) [Internet]. [cited 2021 Apr 25]. Available  
436 from: [https://www.minsalud.gov.co/salud/publica/PENT/Paginas/Enfermedad-pulmonar-](https://www.minsalud.gov.co/salud/publica/PENT/Paginas/Enfermedad-pulmonar-obstructiva-cronica.aspx)  
437 [obstructiva-cronica.aspx](https://www.minsalud.gov.co/salud/publica/PENT/Paginas/Enfermedad-pulmonar-obstructiva-cronica.aspx)
- 438 32. Safiri S, Kolahi AA, Hoy D, et al. Global, regional and national burden of rheumatoid arthritis

- 439 1990-2017: a systematic analysis of the Global Burden of Disease study 2017. *Ann Rheum*  
440 *Dis* [Internet]. 2019 Nov 1 [cited 2021 Apr 25];78(11):1463–71.
- 441 33. Rodríguez-Morales AJ, Cardona-Ospina JA, Fernanda Urbano-Garzón S, et al. Prevalence of  
442 Post-Chikungunya Infection Chronic Inflammatory Arthritis: A Systematic Review and Meta-  
443 Analysis. *Arthritis Care Res (Hoboken)* [Internet]. 2016 Dec [cited 2018 Apr  
444 24];68(12):1849–58.
- 445 34. Favalli EG, Biggioggero M, Crotti C, et al. Sex and Management of Rheumatoid Arthritis  
446 [Internet]. Vol. 56, *Clinical Reviews in Allergy and Immunology*. Humana Press Inc.; 2019  
447 [cited 2021 Jun 27]. p. 333–45.
- 448 35. Lin YJ, Anzaghe M, Schülke S. Update on the Pathomechanism, Diagnosis, and Treatment  
449 Options for Rheumatoid Arthritis [Internet]. Vol. 9, *Cells*. NLM (Medline); 2020 [cited 2021  
450 Jun 27].

451

## 452 **Figures**

453 Figure 1. Flowchart for the selection of cases and controls of the study

454 Figure 2. Interactions between variables that increased the probability of developing chronic arthropathy  
455 or rheumatological disease after clinical chikungunya infection.

456

457

Figure 1.

Flowchart for the selection of cases and controls of the study

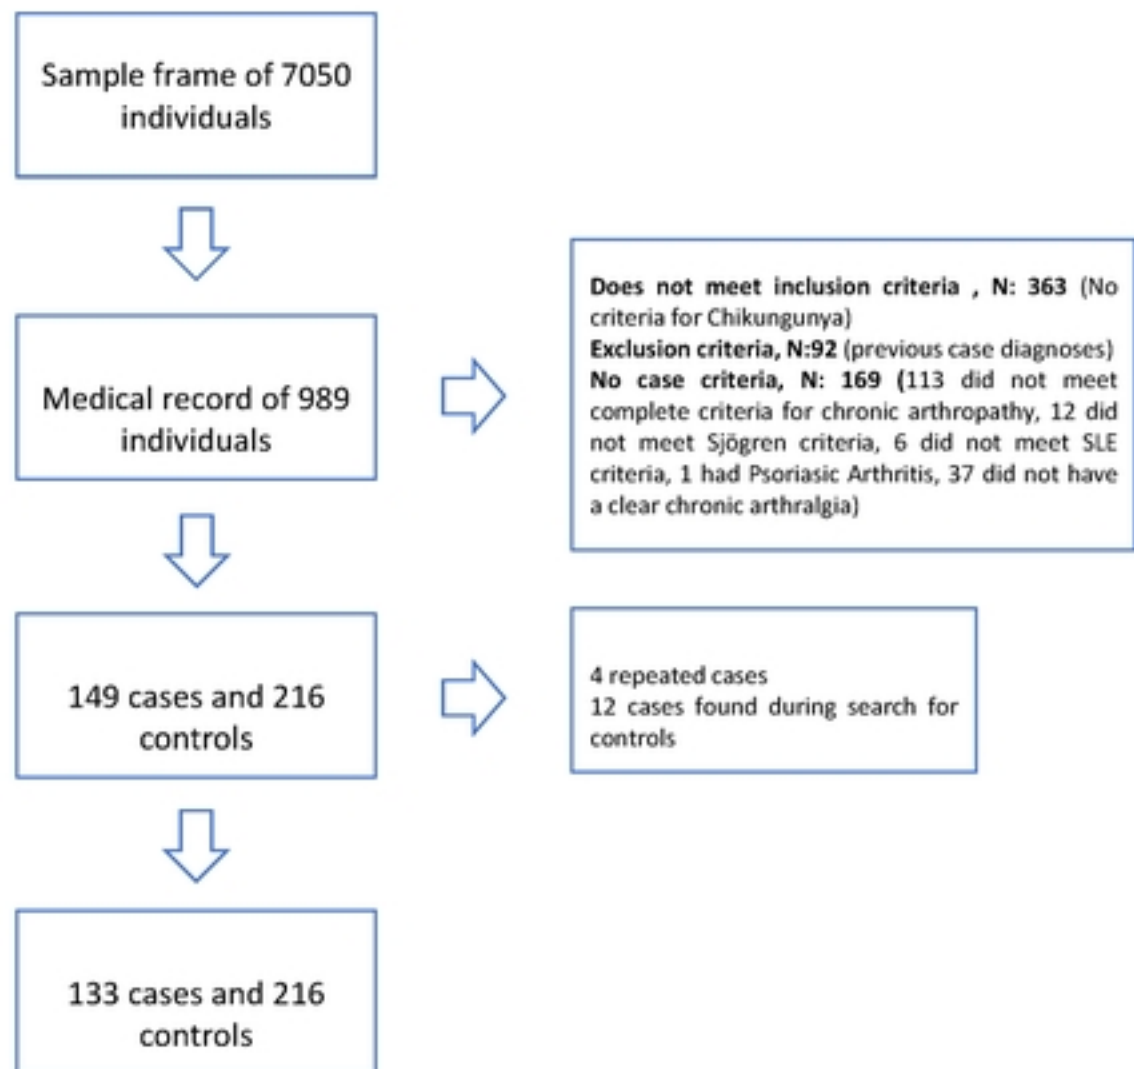

Figure 2.  
Interactions between variables that increased the probability of developing chronic arthropathy or rheumatological disease after clinical chikungunya infection.

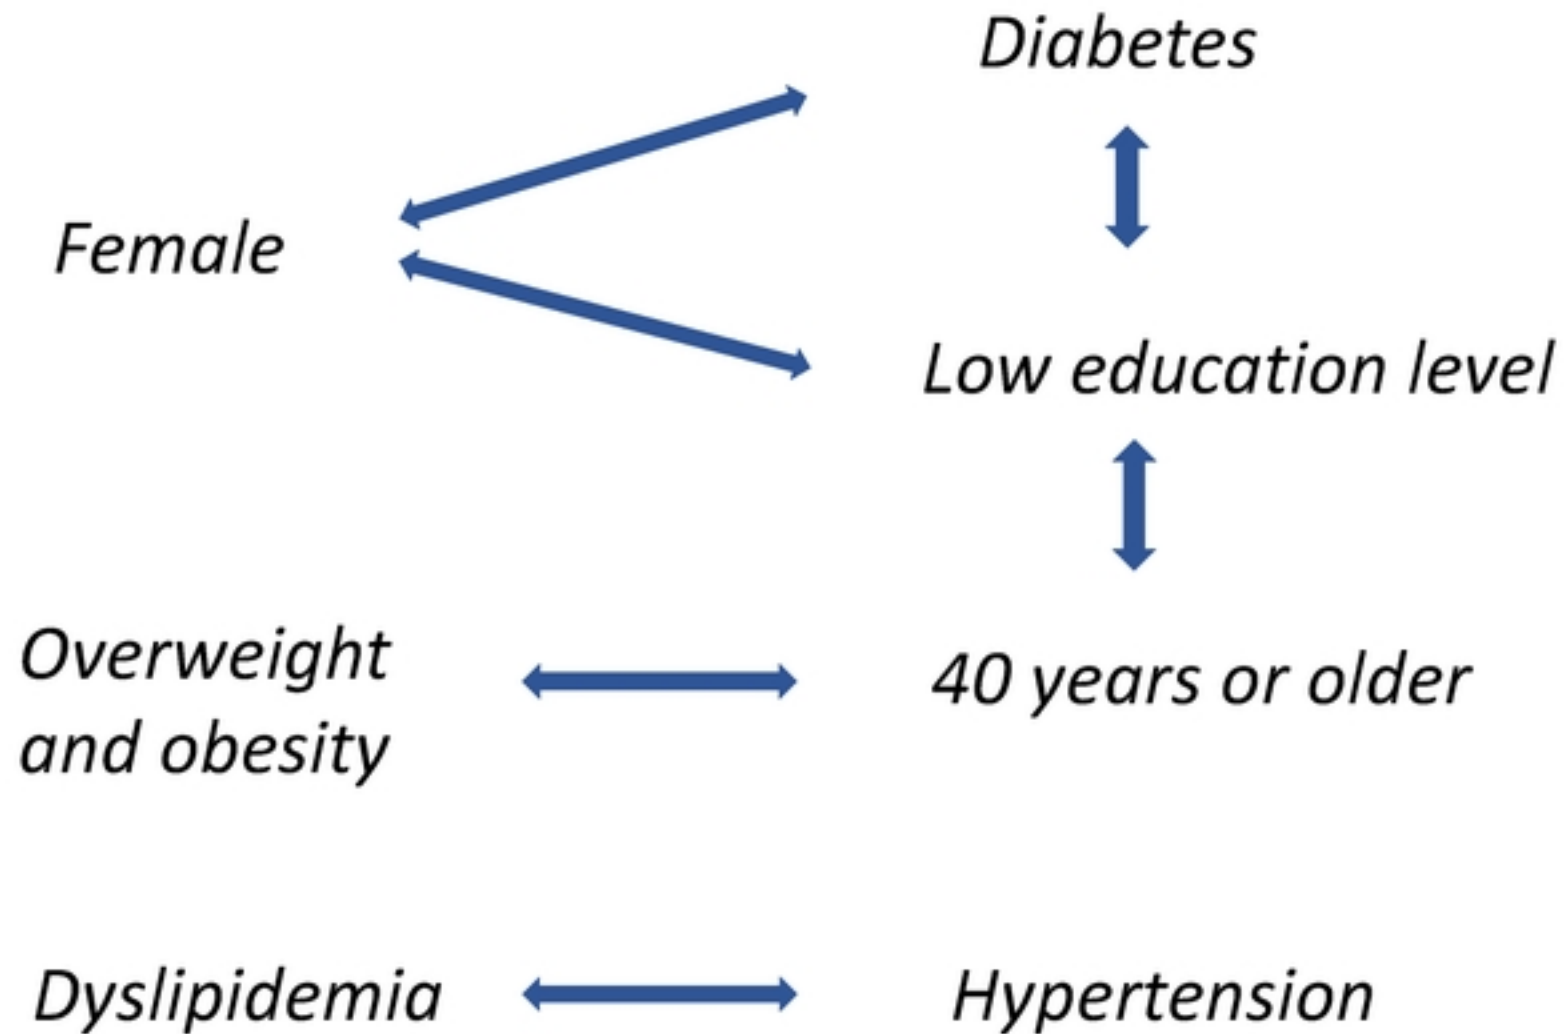

Source: https://medrxiv.org/content/10.1101/2024.05.23.24307784v1.full.pdf
